# Supplementary material for: Elevated EXO1 expression is associated with breast carcinogenesis and poor prognosis
Source: PubMed Central journal article supplement — Ann Transl Med. 2021 Jan;9(2):135. doi: 10.21037/atm-20-7922 (PMC7867906; doi:10.21037/atm-20-7922), 2021-01
Supplement: atm-09-02-135-dss.pdf [file atm-09-02-135-dss.pdf]

## Data Sharing Statement

|                     |                                                                                                                                                     |                                                                                                                                              |
|---------------------|-----------------------------------------------------------------------------------------------------------------------------------------------------|----------------------------------------------------------------------------------------------------------------------------------------------|
| <b>Article Info</b> | <a href="http://dx.doi.org/10.21037/atm-20-7922">http://dx.doi.org/10.21037/atm-20-7922</a>                                                         |                                                                                                                                              |
| <b>Item</b>         | <b>Question</b>                                                                                                                                     | <b>Authors' Response<br/>(place "-" if not applicable)</b>                                                                                   |
| 1                   | Would you like to share data collected for your study to others?                                                                                    | Yes.                                                                                                                                         |
| 2                   | If not, would you like to share the reason for your decision?                                                                                       | -                                                                                                                                            |
| 3                   | What data in particular will be shared?                                                                                                             | The data of cell culture will be shared.                                                                                                     |
| 4                   | Any other documents will be shared? Such as study protocol, statistical analysis plan, informed consent form, clinical study report, analytic code. | Study protocol, statistical analysis plan and analytic code will also be shared if requested.                                                |
| 5                   | When will data availability begin?                                                                                                                  | From the publication date.                                                                                                                   |
| 6                   | When will data availability end?                                                                                                                    | Two years within the publication date, since the technique or survival date may be updated over time.                                        |
| 7                   | To whom will you share the data?                                                                                                                    | Medical oncologists and breast surgeons who are interested in breast cancer studies.                                                         |
| 8                   | For what type of analysis or purpose?                                                                                                               | For analysis to evaluate the relation of elevated EXO1 expression and breast carcinogenesis and poor prognosis                               |
| 9                   | How or where can the data/documents be obtained?                                                                                                    | Emails could be sent to the address below to obtain the shared data:<br><a href="mailto:zhangjintjmuch1@163.com">zhangjintjmuch1@163.com</a> |
| 10                  | Any other restrictions?                                                                                                                             | We may balance the potential benefits and risks for each request and then provide the data that could be shared.                             |
